# Supplementary material for: Reverse Engineering Analysis of the High-Temperature Reversible Oligomerization and Amyloidogenicity of PSD95-PDZ3
Source: MDPI journal article supplement (doi:10.3390/molecules27092813), 2022-04-28
Supplement: s1 [file s1]

## Supplementary Materials

**Figure S1:** Accessible surface models of PDZ3 variants and PDZ3-wt by Pymol

**Figure S2:** Sedimentation velocity analysis of PDZ3 variants by AUC measurements

**Figure S3:** CD spectra of PDZ3 variants

**Figure S4:** Concentration dependence of DSC thermograms of PDZ3 variants fitting by DDCL3 analysis

**Figure S5:** Molar fraction of PDZ3 variants calculated by DDCL3 analysis of DSC thermograms

**Figure S6:** Fitting curve calculated by CD thermal denaturation superimposed to the molar fraction of I<sub>n</sub>+D state calculated from DSC thermograms

**Figure S7:** Time-course fluorescence spectra of PDZ3 variants at 70°C by monitoring ThT and ANS fluorescence

**Figure S8:** Hydrodynamic radii ( $R_h$ ) of PDZ3 variants using DLS measurements

**Figure S9:** Bar plot of Hydrodynamic radius (nm,  $R_h$ ) by DLS measurements

**Table S1:** Accessible Surface Area values of artificial crystallographic PDZ3-F340A calculated by DSSP

**Table S2:** Molecular weight of PDZ3 variants determined by MALDI-TOF MS

**Table S3:** Secondary structure contents of PDZ3 variants calculated by BeStSel

**Table S4:** Sedimentation velocity analysis of PDZ3 variants at 25°C analyzed using SEDFIT and SEDNTERP

**Table S5:** Residues of PDZ3 variants between DSC raw data and fitting curves calculated with DDCL3

**Table S6:** Hydrodynamic radius (nm,  $R_h$ ) by DLS

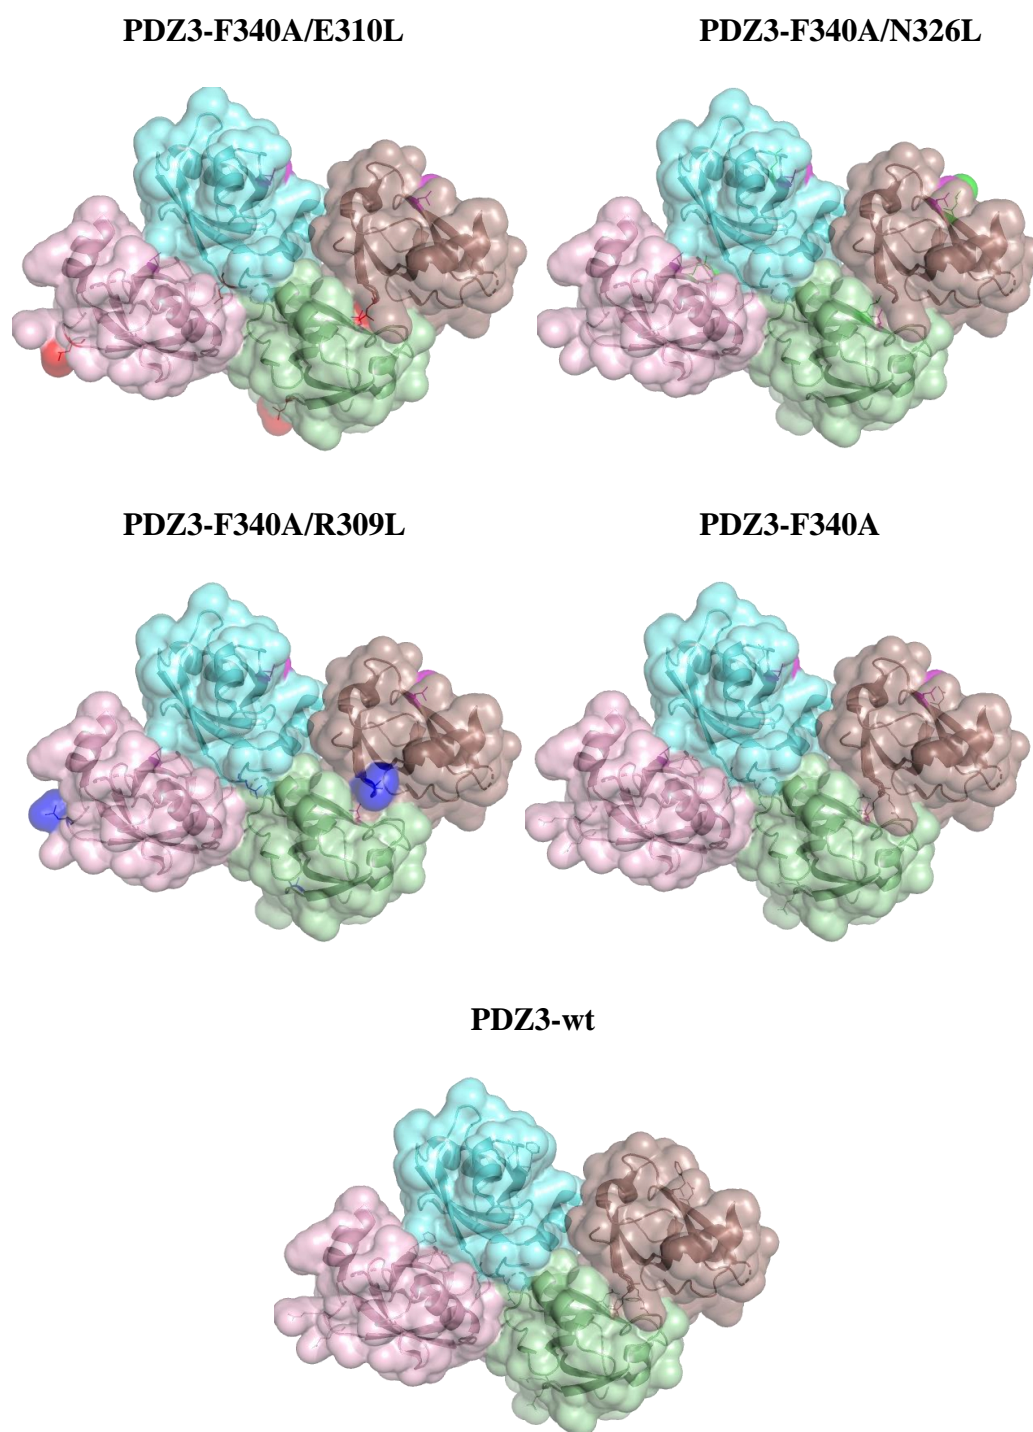

**Figure S1:** Accessible surface models of PDZ3 variants and PDZ3-wt (PDB ID: 3I4W) drawn using Pymol. The sites of single alanine mutation in PDZ3-F340A template protein are shown in magenta. E310L, N326L, R309L, and F340A are shown in red, green, blue, and magenta. Chains A, B, C, and D are shown in light blue, light green, light pink, and brown.

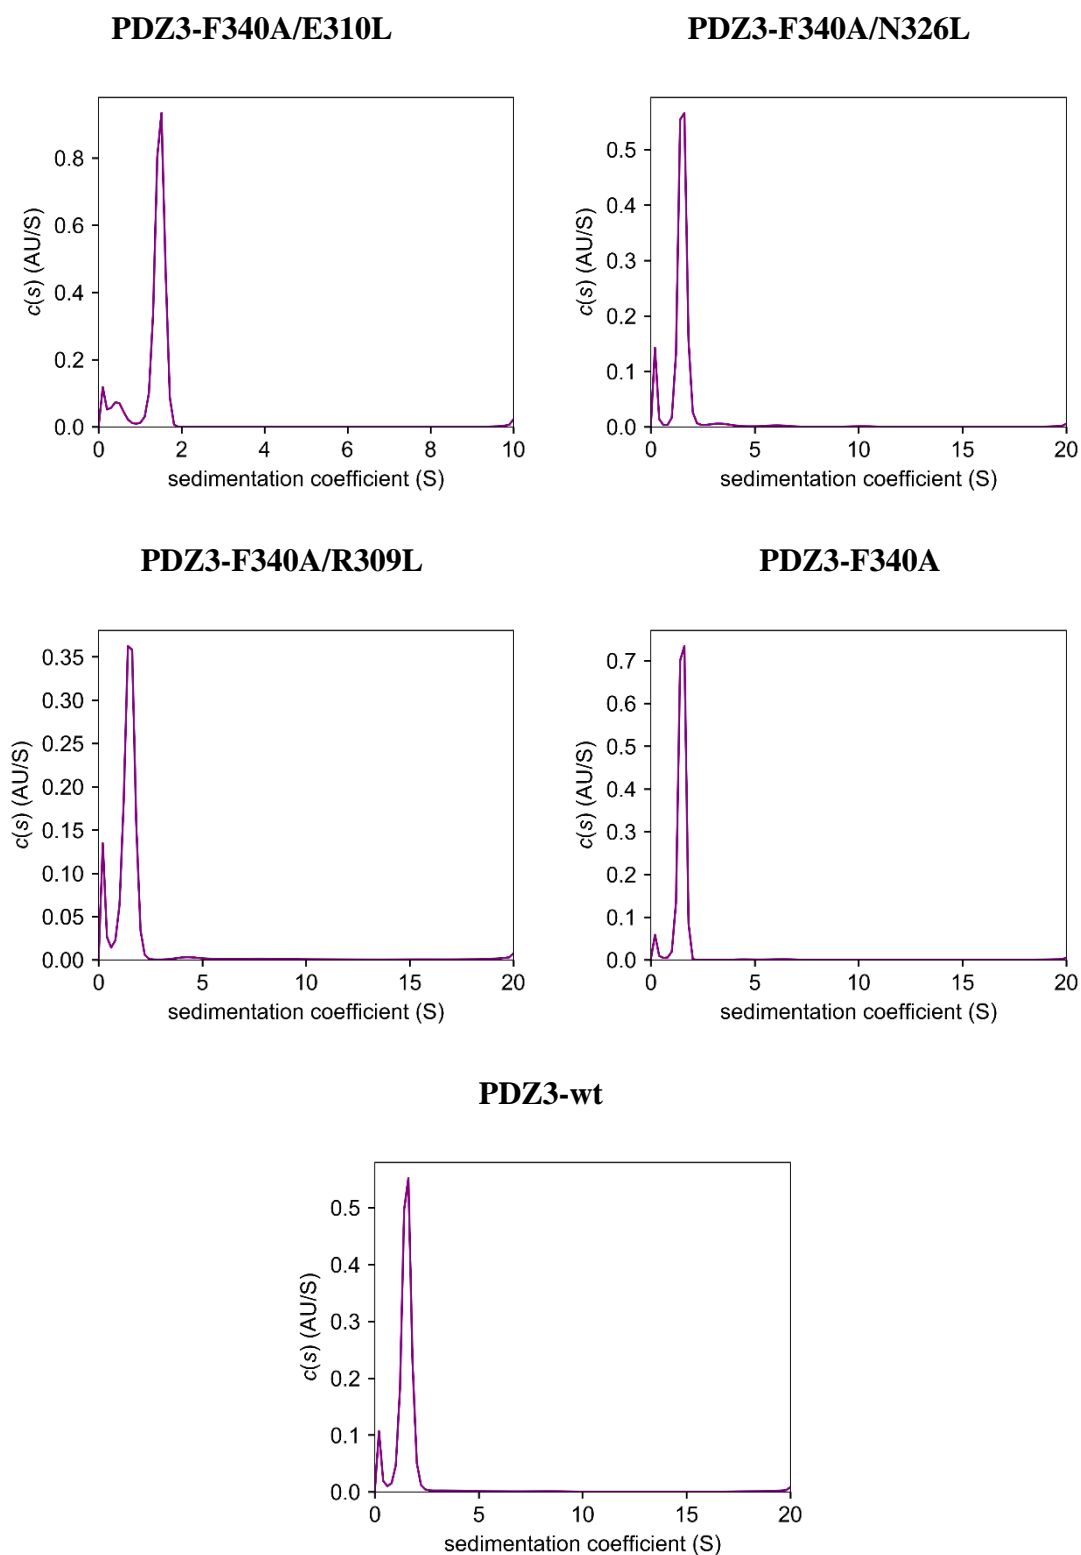

**Figure S2:** Sedimentation velocity analysis of PDZ3 variants was performed with AUC experiments at 1 mg/mL in 50 mM potassium phosphate buffer pH 7.5 and 25°C. Samples were centrifuged at a speed of 50,000 rpm, and sedimentation velocity data were analyzed using SEDFIT and SEDNTERP [42-43].

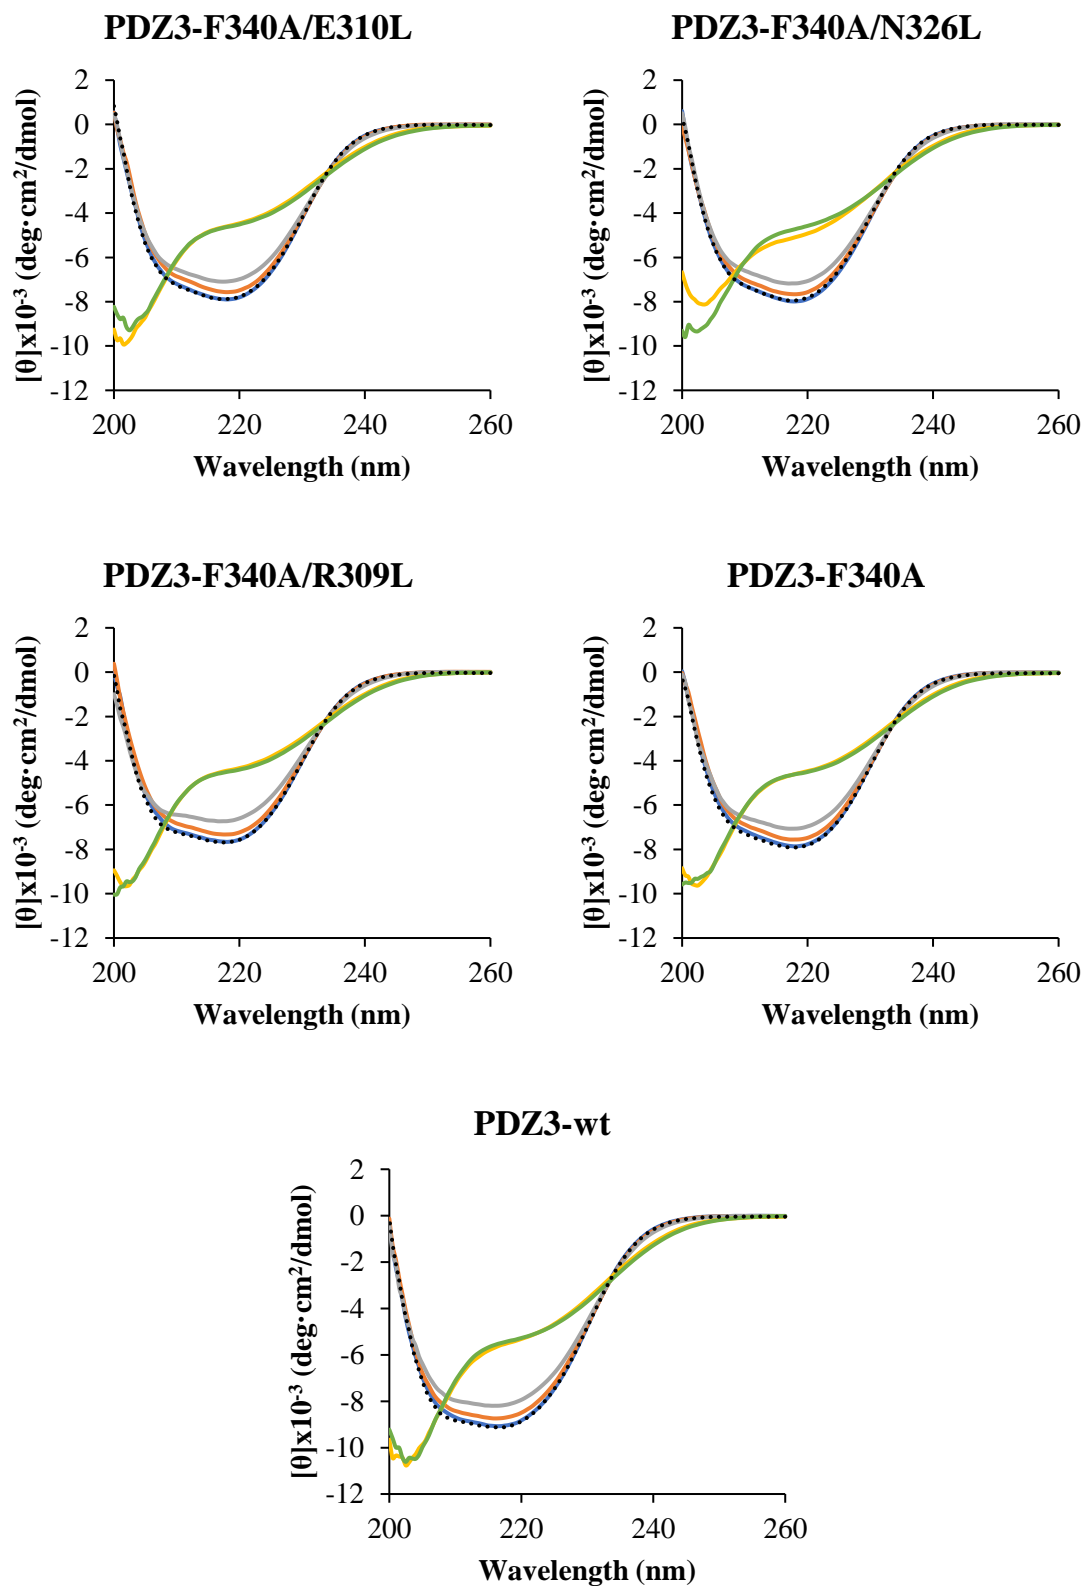

**Figure S3:** CD spectra of PDZ3 variants at 0.2 mg/mL, pH 7.5 and 25-90°C. Sample were heated up from 25°C to 90°C and cooled down to 25°C. 25°C (blue); 40°C (orange); 60°C (gray); 80°C (yellow); 90°C (green); 25°C after heating (dotted black).

**PDZ3-F340A/E310L**

(1 mg/mL, N-D model)

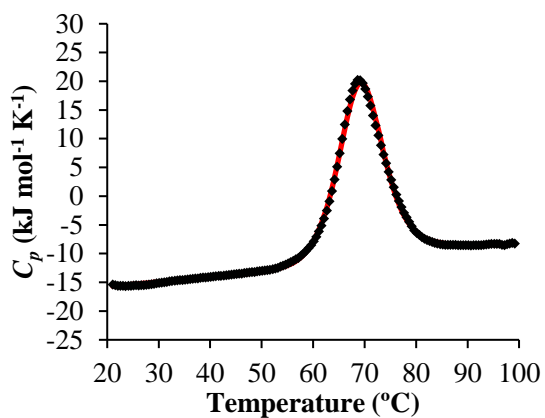

**PDZ3-F340A/E310L**

(0.5 mg/mL, N-D model)

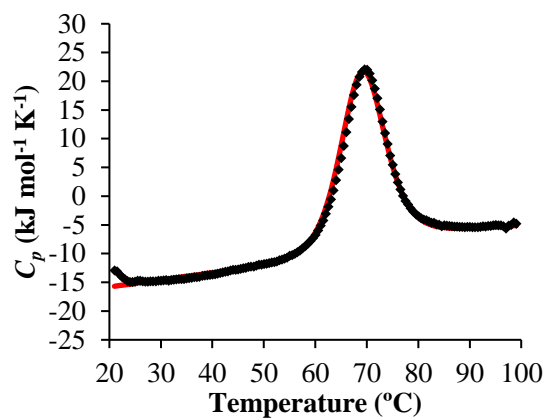

**PDZ3-F340A/N326L**

(1 mg/mL, N-I<sub>4</sub>-D model)

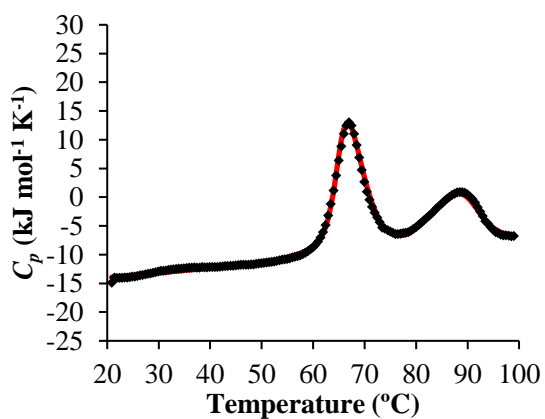

**PDZ3-F340A/N326L**

(0.5 mg/mL, N-I<sub>4</sub>-D model)

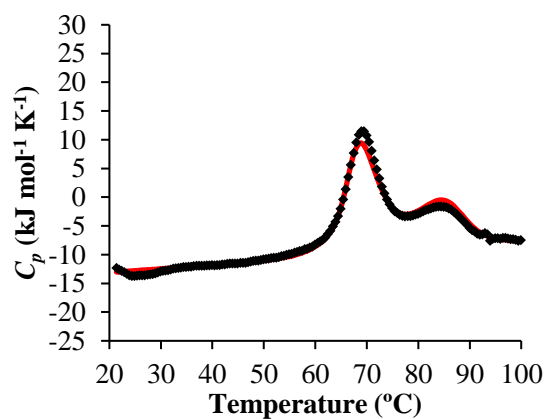

**PDZ3-F340A/R309L**

(1 mg/mL, N-D model)

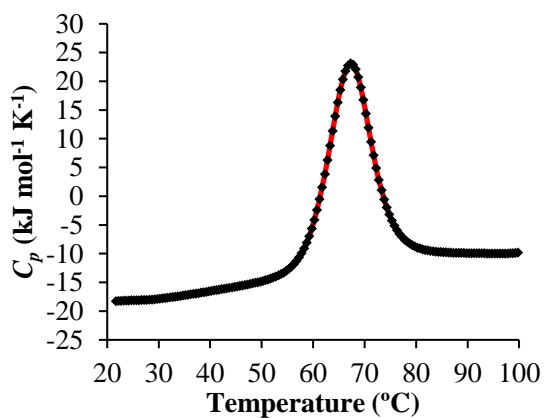

**PDZ3-F340A/R309L**

(0.5 mg/mL, N-D model)

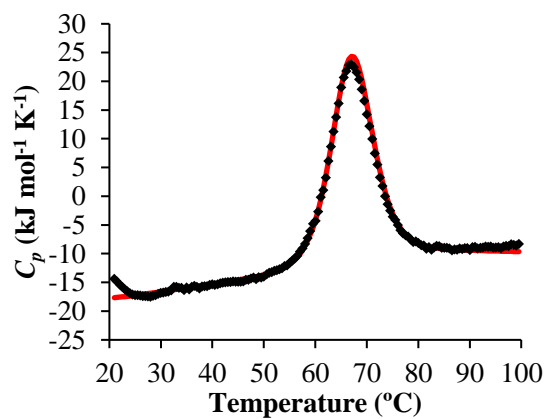

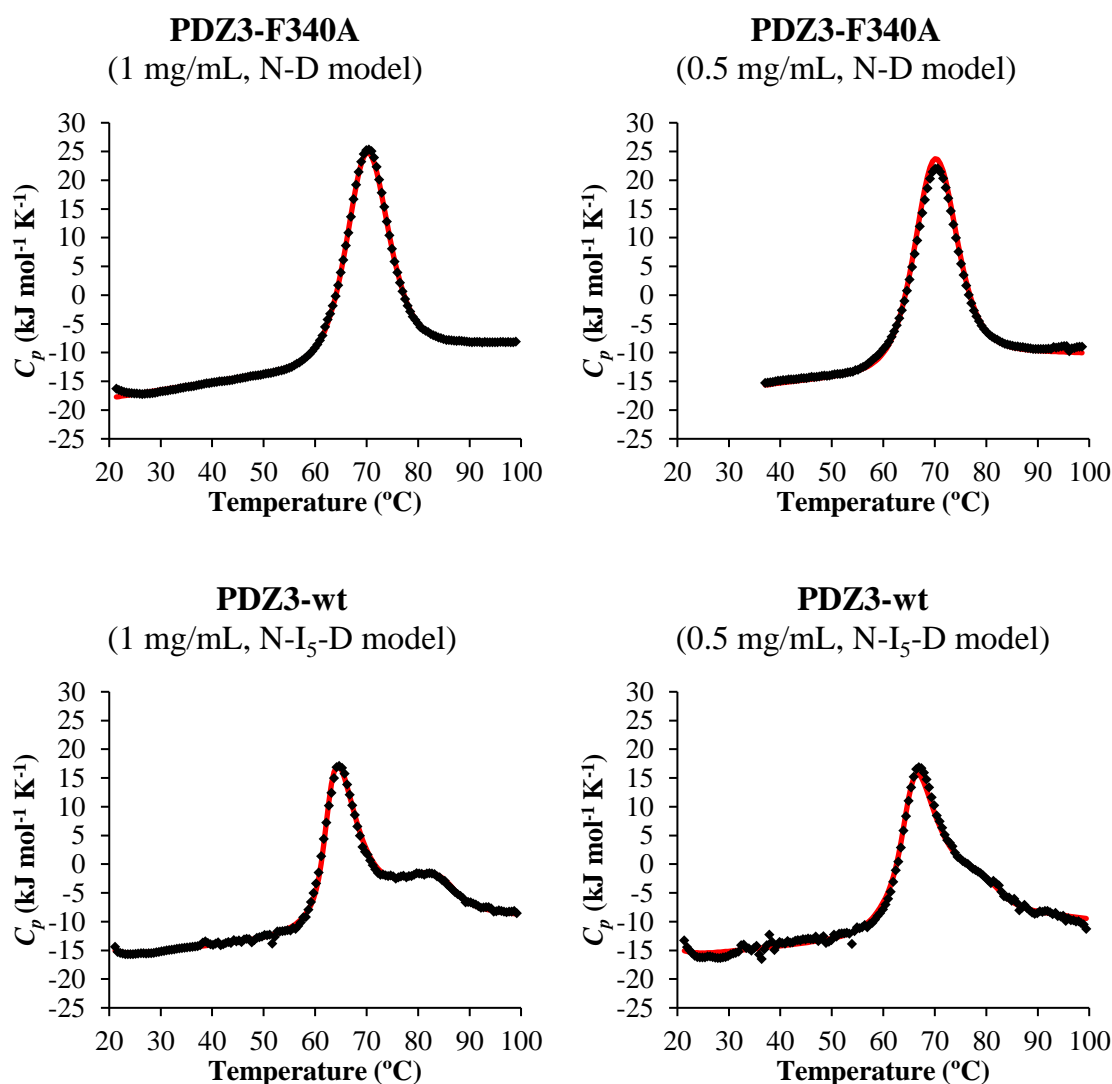

**Figure S4:** Fitting of PDZ3-F340A/E310L (N-D model), PDZ3-F340A/N326L (N-I<sub>4</sub>-D), PDZ3-F340A/R309L (N-D model), PDZ3-F340A (N-D model), and PDZ3-wt (N-I<sub>5</sub>-D model) by DDCL3 analysis of DSC thermograms at 0.5 and 1 mg/mL, pH 7.5 and +1°C/min scan rate. Black dot represents DSC raw data at 1 mg/mL and 0.5 mg/mL, respectively. The red line represents the fitting curve.

**PDZ3-F340A/E310L**

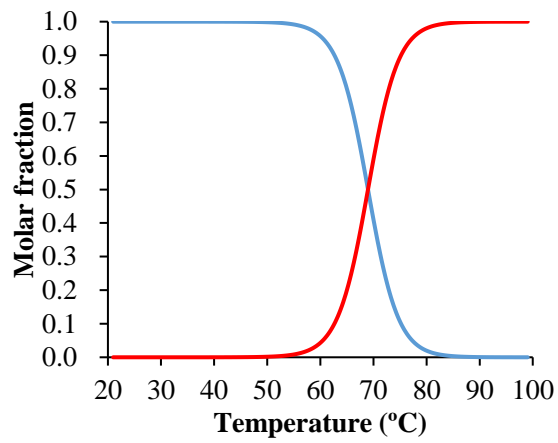

**PDZ3-F340A/N326L**

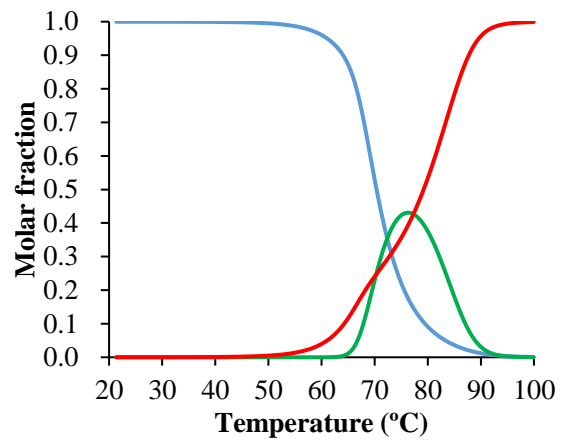

**PDZ3-F340A/R309L**

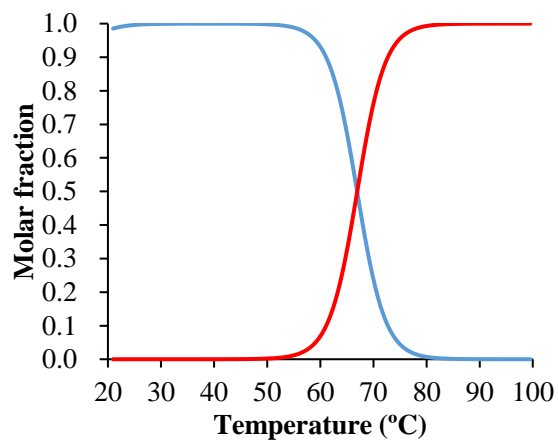

**PDZ3-F340A**

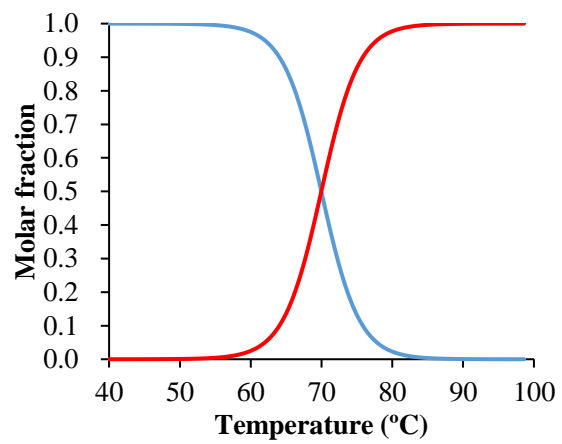

**PDZ3-wt**

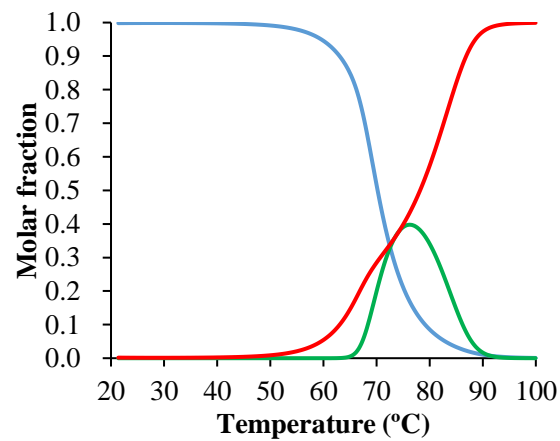

**Figure S5:** Molar fraction of PDZ3-F340A/E310L (N-D model), PDZ3-F340A/N326L (N-I<sub>4</sub>-D model), PDZ3-F340A/R309L (N-D model), PDZ3-F340A (N-D model), PDZ3-wt (N-I<sub>5</sub>-D model) by DDCL3 analysis of DSC thermograms at 0.5 mg/mL, pH 7.5 and +1°C/min scan rate. Natively folded monomer (blue); Intermediate oligomer (green); Unfolded monomer (red).



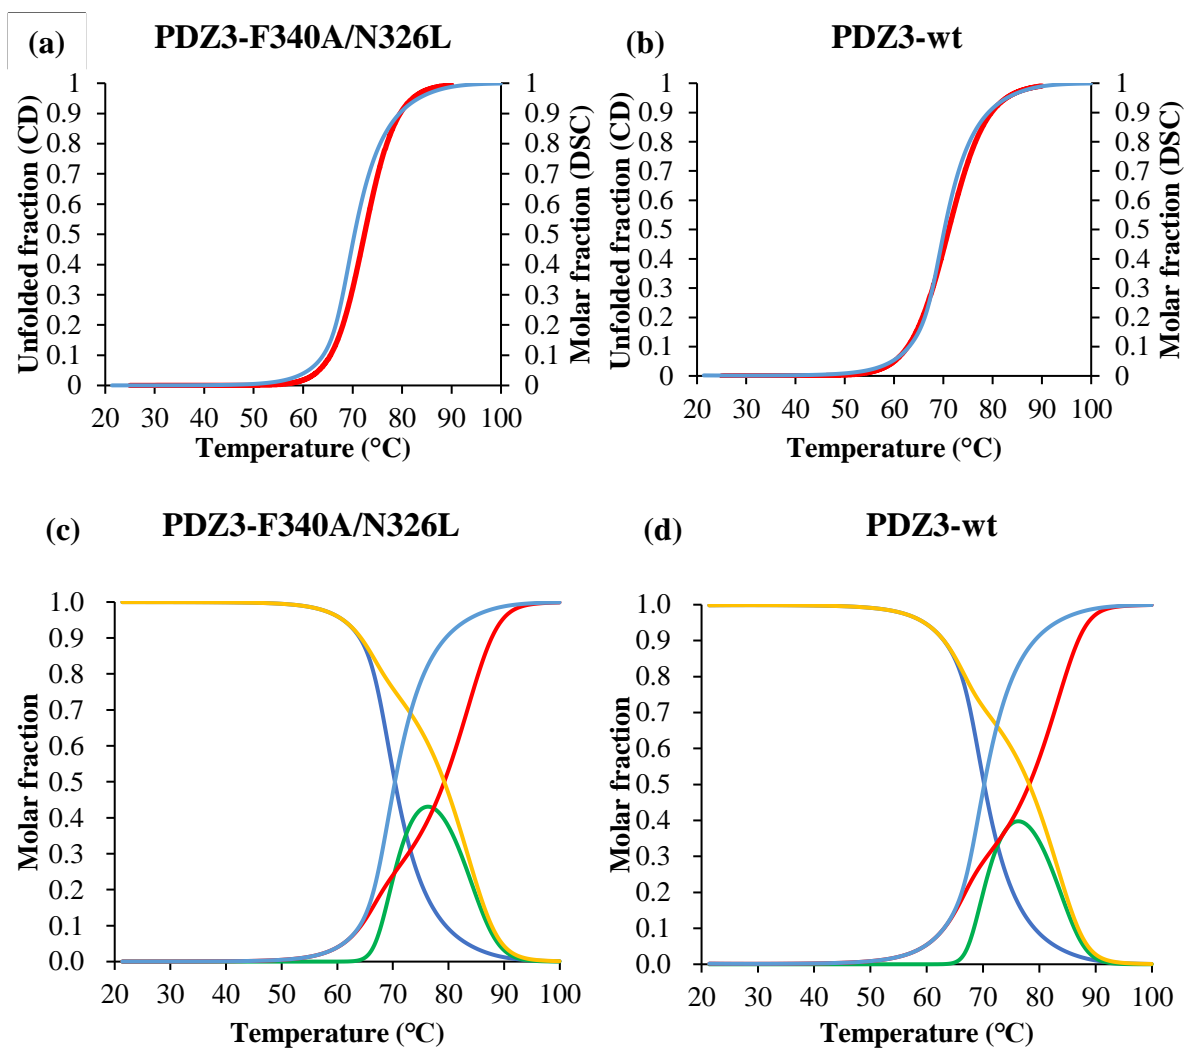

**Figure S6:** Fitting curve calculated from CD thermal denaturation and molar fraction in the  $I_n+D$  state calculated from the DSC thermograms of (a) PDZ3-F340A/N326L; (b) PDZ3-wt. The blue line represents the molar fraction of the  $I_n+D$  state, and the red line represents the fitting curve of the CD data. Molar fraction of (c) PDZ3-F340A/N326L (N- $I_4$ -D model); (d) PDZ3-wt (N- $I_5$ -D model) calculated using the DDCL3 analysis of DSC thermograms. Natively folded monomer (N) (dark blue); Intermediate oligomer ( $I_n$ ) (green); Unfolded monomer (D) (red); Natively folded and intermediate oligomer ( $N+I_n$ ) (yellow); Intermediate oligomer and unfolded monomer ( $I_n+D$ ) (light blue). Experiments (CD and DSC) were performed at 0.5 mg/mL and pH 7.5, +1.0 °C/min scan rate.

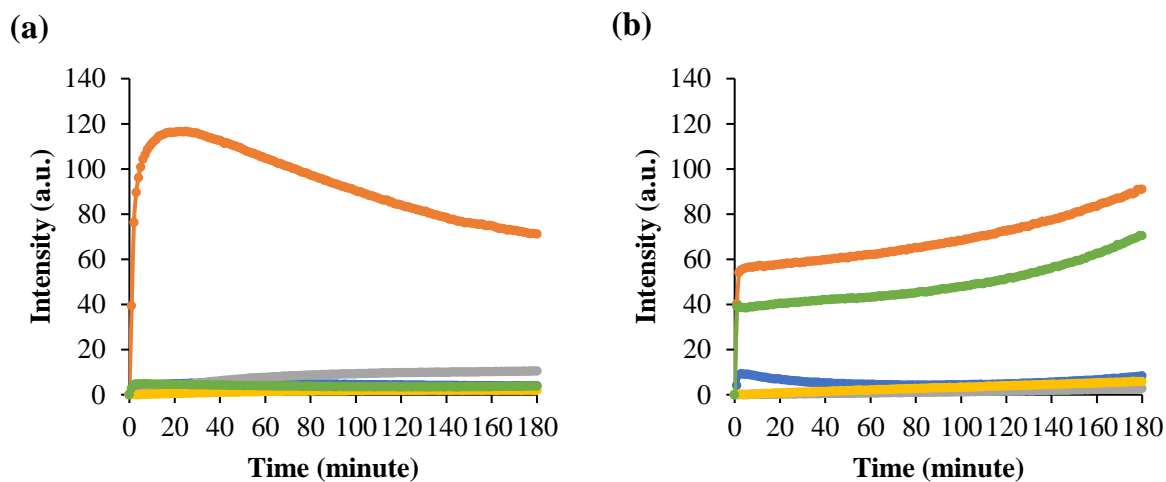

**Figure S7:** Time-course of RO formation of PDZ3 variants monitored by (a) ThT fluorescence at  $\lambda_{Em}$  480 nm. The dye concentration was 12  $\mu$ M; (b) ANS fluorescence at  $\lambda_{Em}$  480 nm. The dye concentration was 20  $\mu$ M. Protein concentration was 1 mg/mL in pH 7.5. Mixture samples were measured at 60°C for 180 minutes. PDZ3-F340A/E310L (blue); PDZ3-F340A/N326L (orange); PDZ3-F340A/R309L (gray); PDZ3-F340A (yellow); and PDZ3-wt (green).

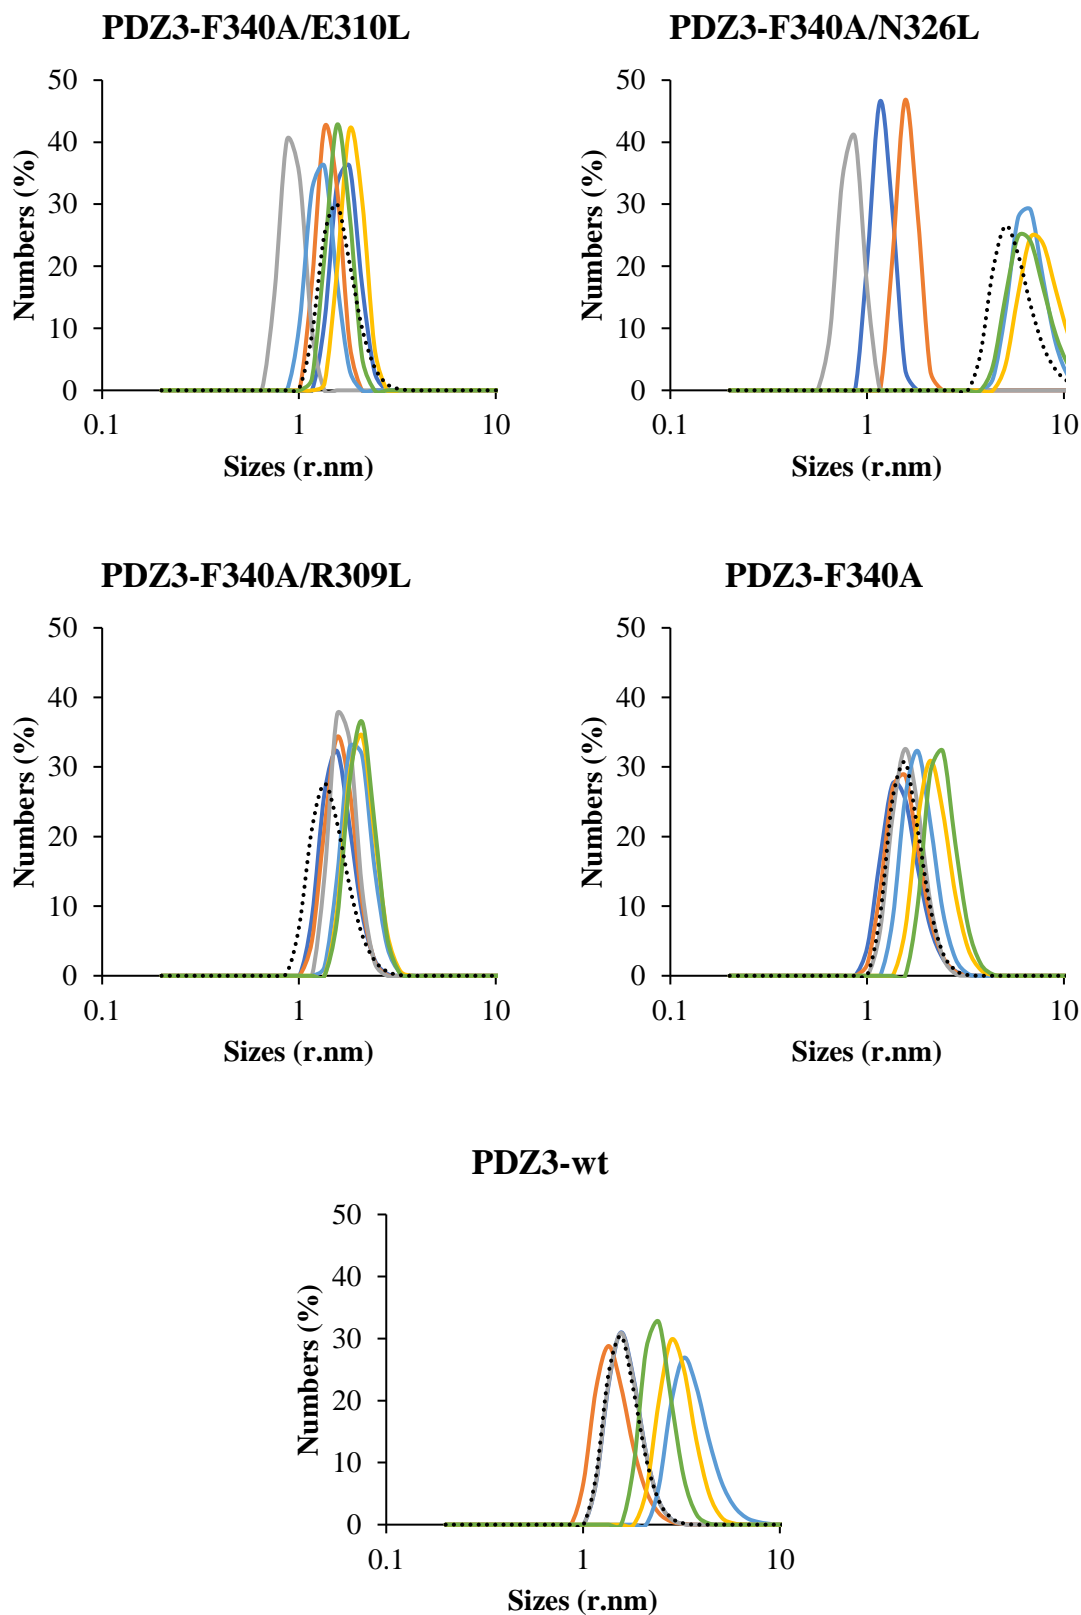

**Figure S8:** Size-numbers plots of PDZ3 variants at 1 mg/mL, pH 7.5 and 25-90°C by DLS measurements. Hydrodynamic radii ( $R_h$ ) were measured by increasing the temperature from

25°C to 90°C and decreasing to 25°C. 25°C (blue); 40°C (orange); 60°C (gray); 70°C (cyan); 80°C (yellow); 90°C (green); 25°C after heating (dotted black).

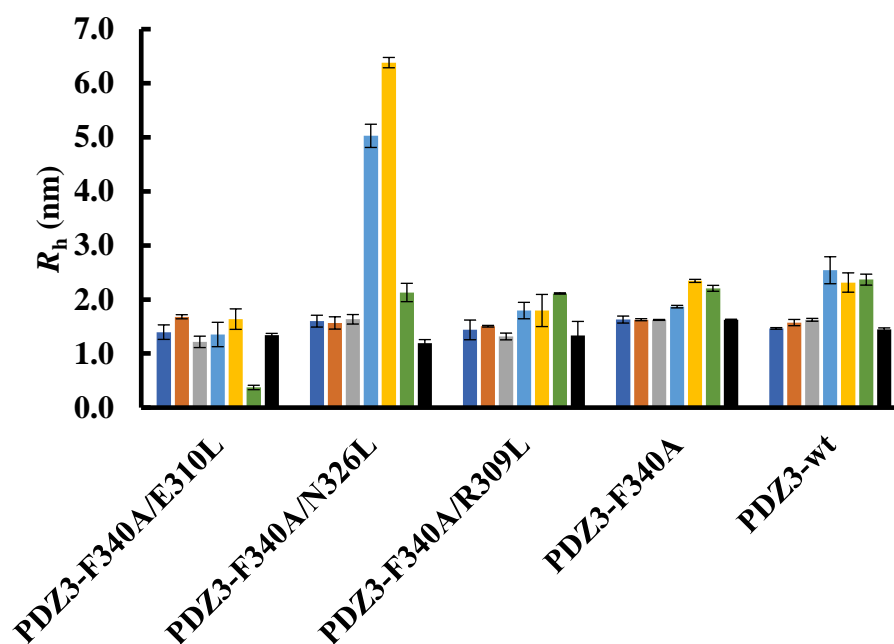

**Figure S9:** Bar plot of Hydrodynamic radius (nm,  $R_h$ ) by DLS measurements. Hydrodynamic radii ( $R_h$ ) of PDZ3 variants at 0.5 mg/mL, pH 7.5 were measured by increasing the temperature from 25°C to 90°C and cooling to 25°C. 25°C (blue); 40°C (orange); 60°C (gray); 70°C (cyan); 80°C (yellow); 90°C (green); 25°C after heating (black).

**Table S1:** Accessible Surface Area values of artificial crystallographic PDZ3-F340A calculated by DSSP

| Residue | Monomeric ASA (Å <sup>2</sup> ) |     |     |     | Tetrameric ASA (Å <sup>2</sup> ) |     |     |     | Tetrameric BSA (Å <sup>2</sup> ) |     |    |    | Total RSA (%) |
|---------|---------------------------------|-----|-----|-----|----------------------------------|-----|-----|-----|----------------------------------|-----|----|----|---------------|
|         | A                               | B   | C   | D   | A                                | B   | C   | D   | A                                | B   | C  | D  |               |
| GLU 305 | 195                             | 194 | 153 | 180 | 124                              | 194 | 153 | 180 | 71                               | 0   | 0  | 0  | 32            |
| ASP 306 | 135                             | 149 | 147 | 131 | 129                              | 149 | 147 | 131 | 6                                | 0   | 0  | 0  | 3             |
| ILE 307 | 32                              | 39  | 22  | 40  | 7                                | 39  | 22  | 40  | 25                               | 0   | 0  | 0  | 13            |
| PRO 308 | 64                              | 71  | 64  | 65  | 35                               | 71  | 64  | 54  | 29                               | 0   | 0  | 11 | 25            |
| ARG 309 | 216                             | 218 | 220 | 218 | 27                               | 218 | 220 | 202 | 189                              | 0   | 0  | 16 | <u>75</u>     |
| GLU 310 | 142                             | 145 | 140 | 143 | 28                               | 145 | 140 | 46  | 114                              | 0   | 0  | 97 | <u>95</u>     |
| PRO 311 | 67                              | 69  | 65  | 67  | 20                               | 69  | 65  | 17  | 47                               | 0   | 0  | 50 | <u>61</u>     |
| ARG 312 | 36                              | 33  | 35  | 30  | 31                               | 33  | 35  | 24  | 5                                | 0   | 0  | 6  | 4             |
| ARG 313 | 169                             | 169 | 164 | 172 | 90                               | 169 | 164 | 81  | 79                               | 0   | 0  | 91 | <u>62</u>     |
| ILE 314 | 1                               | 1   | 1   | 3   | 1                                | 1   | 1   | 3   | 0                                | 0   | 0  | 0  | 0             |
| VAL 315 | 50                              | 52  | 50  | 53  | 50                               | 52  | 50  | 50  | 0                                | 0   | 0  | 3  | 2             |
| ILE 316 | 3                               | 3   | 3   | 4   | 3                                | 3   | 3   | 4   | 0                                | 0   | 0  | 0  | 0             |
| HIS 317 | 115                             | 114 | 117 | 115 | 115                              | 114 | 117 | 75  | 0                                | 0   | 0  | 40 | 18            |
| ARG 318 | 55                              | 50  | 77  | 51  | 55                               | 28  | 45  | 51  | 0                                | 22  | 32 | 0  | 20            |
| GLY 319 | 38                              | 42  | 38  | 41  | 38                               | 37  | 33  | 41  | 0                                | 5   | 5  | 0  | 10            |
| SER 320 | 131                             | 132 | 132 | 131 | 131                              | 100 | 66  | 131 | 0                                | 32  | 66 | 0  | <u>63</u>     |
| THR 321 | 76                              | 77  | 76  | 80  | 76                               | 20  | 8   | 80  | 0                                | 57  | 68 | 0  | <u>73</u>     |
| GLY 322 | 25                              | 24  | 22  | 25  | 25                               | 2   | 0   | 25  | 0                                | 22  | 22 | 0  | <u>42</u>     |
| LEU 323 | 13                              | 13  | 12  | 14  | 13                               | 8   | 12  | 14  | 0                                | 5   | 0  | 0  | 2             |
| GLY 324 | 3                               | 4   | 4   | 3   | 3                                | 3   | 4   | 3   | 0                                | 1   | 0  | 0  | 1             |
| PHE 325 | 19                              | 21  | 20  | 21  | 19                               | 21  | 20  | 21  | 0                                | 0   | 0  | 0  | 0             |
| ASN 326 | 109                             | 107 | 110 | 107 | 109                              | 23  | 21  | 107 | 0                                | 84  | 89 | 0  | <u>89</u>     |
| ILE 327 | 21                              | 23  | 19  | 23  | 21                               | 21  | 12  | 23  | 0                                | 2   | 7  | 0  | 5             |
| VAL 328 | 34                              | 35  | 33  | 33  | 34                               | 2   | 2   | 33  | 0                                | 33  | 31 | 0  | <u>37</u>     |
| GLY 329 | 8                               | 8   | 8   | 9   | 8                                | 0   | 8   | 9   | 0                                | 8   | 0  | 0  | 8             |
| GLY 330 | 13                              | 14  | 13  | 14  | 13                               | 4   | 13  | 14  | 0                                | 10  | 0  | 0  | 10            |
| GLU 331 | 175                             | 175 | 173 | 174 | 175                              | 12  | 173 | 174 | 0                                | 163 | 0  | 0  | <u>73</u>     |
| SNN 332 | 0                               | 0   | 0   | 0   | 0                                | 0   | 0   | 0   | 0                                | 0   | 0  | 0  | 0             |
| GLY 333 | 96                              | 100 | 96  | 98  | 96                               | 34  | 96  | 98  | 0                                | 66  | 0  | 0  | <u>63</u>     |
| GLU 334 | 19                              | 20  | 16  | 18  | 19                               | 6   | 16  | 18  | 0                                | 14  | 0  | 0  | 6             |

| Residue        | Monomeric ASA (Å <sup>2</sup> ) |     |     |     | Tetrameric ASA (Å <sup>2</sup> ) |     |     |     | Tetrameric BSA (Å <sup>2</sup> ) |    |    |    | Total<br>RSA<br>(%) |
|----------------|---------------------------------|-----|-----|-----|----------------------------------|-----|-----|-----|----------------------------------|----|----|----|---------------------|
|                | A                               | B   | C   | D   | A                                | B   | C   | D   | A                                | B  | C  | D  |                     |
| GLY 335        | 10                              | 10  | 10  | 11  | 10                               | 3   | 10  | 11  | 0                                | 7  | 0  | 0  | 7                   |
| ILE 336        | 0                               | 0   | 0   | 0   | 0                                | 0   | 0   | 0   | 0                                | 0  | 0  | 0  | 0                   |
| PHE 337        | 0                               | 0   | 0   | 0   | 0                                | 0   | 0   | 0   | 0                                | 0  | 0  | 0  | 0                   |
| ILE 338        | 0                               | 0   | 0   | 0   | 0                                | 0   | 0   | 0   | 0                                | 0  | 0  | 0  | 0                   |
| SER 339        | 28                              | 24  | 27  | 25  | 28                               | 5   | 17  | 25  | 0                                | 19 | 10 | 0  | 19                  |
| <b>ALA 340</b> | 43                              | 41  | 43  | 41  | 43                               | 25  | 31  | 41  | 0                                | 16 | 12 | 0  | 12                  |
| ILE 341        | 53                              | 48  | 52  | 48  | 53                               | 48  | 52  | 48  | 0                                | 0  | 0  | 0  | 0                   |
| LEU 342        | 85                              | 87  | 84  | 85  | 85                               | 17  | 17  | 85  | 0                                | 70 | 67 | 0  | <u>68</u>           |
| ALA 343        | 88                              | 86  | 91  | 88  | 88                               | 47  | 48  | 88  | 0                                | 39 | 43 | 0  | <u>64</u>           |
| GLY 344        | 56                              | 52  | 50  | 52  | 56                               | 50  | 41  | 52  | 0                                | 2  | 9  | 0  | 11                  |
| GLY 345        | 6                               | 4   | 6   | 3   | 6                                | 3   | 3   | 3   | 0                                | 1  | 3  | 0  | 4                   |
| PRO 346        | 31                              | 29  | 28  | 31  | 31                               | 29  | 28  | 31  | 0                                | 0  | 0  | 0  | 0                   |
| ALA 347        | 1                               | 0   | 0   | 0   | 1                                | 0   | 0   | 0   | 0                                | 0  | 0  | 0  | 0                   |
| ASP 348        | 75                              | 68  | 73  | 70  | 75                               | 68  | 73  | 70  | 0                                | 0  | 0  | 0  | 0                   |
| LEU 349        | 143                             | 127 | 136 | 127 | 143                              | 127 | 136 | 127 | 0                                | 0  | 0  | 0  | 0                   |
| SER 350        | 38                              | 28  | 38  | 34  | 38                               | 28  | 38  | 34  | 0                                | 0  | 0  | 0  | 0                   |
| GLY 351        | 64                              | 64  | 60  | 61  | 64                               | 64  | 60  | 61  | 0                                | 0  | 0  | 0  | 0                   |
| GLU 352        | 91                              | 89  | 89  | 102 | 91                               | 89  | 89  | 102 | 0                                | 0  | 0  | 0  | 0                   |
| LEU 353        | 11                              | 11  | 11  | 11  | 11                               | 11  | 11  | 11  | 0                                | 0  | 0  | 0  | 0                   |
| ARG 354        | 71                              | 52  | 75  | 68  | 69                               | 52  | 75  | 68  | 2                                | 0  | 0  | 0  | 1                   |
| LYS 355        | 123                             | 120 | 124 | 122 | 123                              | 120 | 124 | 122 | 0                                | 0  | 0  | 0  | 0                   |
| GLY 356        | 1                               | 1   | 0   | 0   | 1                                | 1   | 0   | 0   | 0                                | 0  | 0  | 0  | 0                   |
| ASP 357        | 0                               | 0   | 0   | 0   | 0                                | 0   | 0   | 0   | 0                                | 0  | 0  | 0  | 0                   |
| GLN 358        | 14                              | 13  | 14  | 12  | 14                               | 13  | 14  | 12  | 0                                | 0  | 0  | 0  | 0                   |
| ILE 359        | 0                               | 0   | 0   | 0   | 0                                | 0   | 0   | 0   | 0                                | 0  | 0  | 0  | 0                   |
| LEU 360        | 23                              | 19  | 20  | 20  | 3                                | 19  | 20  | 2   | 20                               | 0  | 0  | 18 | 19                  |
| SER 361        | 23                              | 23  | 24  | 23  | 15                               | 23  | 24  | 18  | 8                                | 0  | 0  | 5  | 8                   |
| VAL 362        | 1                               | 1   | 1   | 1   | 1                                | 1   | 1   | 1   | 0                                | 0  | 0  | 0  | 0                   |
| ASN 363        | 68                              | 72  | 69  | 69  | 68                               | 72  | 69  | 69  | 0                                | 0  | 0  | 0  | 0                   |
| GLY 364        | 71                              | 68  | 69  | 69  | 71                               | 68  | 69  | 69  | 0                                | 0  | 0  | 0  | 0                   |
| VAL 365        | 74                              | 75  | 75  | 76  | 74                               | 75  | 75  | 76  | 0                                | 0  | 0  | 0  | 0                   |
| ASP 366        | 108                             | 91  | 107 | 88  | 75                               | 68  | 107 | 77  | 33                               | 23 | 0  | 11 | <u>35</u>           |

| Residue | Monomeric ASA (Å <sup>2</sup> ) |     |     |     | Tetrameric ASA (Å <sup>2</sup> ) |     |     |     | Tetrameric BSA (Å <sup>2</sup> ) |     |    |    | Total<br>RSA<br>(%) |
|---------|---------------------------------|-----|-----|-----|----------------------------------|-----|-----|-----|----------------------------------|-----|----|----|---------------------|
|         | A                               | B   | C   | D   | A                                | B   | C   | D   | A                                | B   | C  | D  |                     |
| LEU 367 | 3                               | 3   | 4   | 3   | 3                                | 3   | 4   | 3   | 0                                | 0   | 0  | 0  | 0                   |
| ARG 368 | 177                             | 150 | 174 | 153 | 84                               | 131 | 174 | 74  | 93                               | 19  | 0  | 79 | <u>70</u>           |
| ASN 369 | 154                             | 160 | 157 | 160 | 154                              | 17  | 157 | 160 | 0                                | 143 | 0  | 0  | <u>73</u>           |
| ALA 370 | 12                              | 14  | 11  | 13  | 12                               | 7   | 11  | 13  | 0                                | 7   | 0  | 0  | 5                   |
| SER 371 | 46                              | 44  | 47  | 45  | 46                               | 5   | 47  | 45  | 0                                | 39  | 0  | 0  | 25                  |
| HIS 372 | 73                              | 70  | 75  | 71  | 73                               | 50  | 71  | 71  | 0                                | 20  | 4  | 0  | 11                  |
| GLU 373 | 126                             | 123 | 108 | 120 | 126                              | 91  | 108 | 120 | 0                                | 32  | 0  | 0  | 14                  |
| GLN 374 | 117                             | 118 | 116 | 119 | 117                              | 46  | 116 | 119 | 0                                | 72  | 0  | 0  | 32                  |
| ALA 375 | 0                               | 0   | 0   | 0   | 0                                | 0   | 0   | 0   | 0                                | 0   | 0  | 0  | 0                   |
| ALA 376 | 33                              | 31  | 32  | 30  | 33                               | 31  | 32  | 30  | 0                                | 0   | 0  | 0  | 0                   |
| ILE 377 | 73                              | 75  | 71  | 73  | 73                               | 63  | 71  | 73  | 0                                | 12  | 0  | 0  | 6                   |
| ALA 378 | 14                              | 24  | 17  | 23  | 14                               | 24  | 17  | 23  | 0                                | 0   | 0  | 0  | 0                   |
| LEU 379 | 16                              | 14  | 14  | 14  | 16                               | 12  | 14  | 14  | 0                                | 2   | 0  | 0  | 1                   |
| LYS 380 | 138                             | 138 | 138 | 140 | 138                              | 113 | 50  | 140 | 0                                | 25  | 88 | 0  | <u>48</u>           |
| ASN 381 | 111                             | 116 | 112 | 115 | 111                              | 116 | 88  | 115 | 0                                | 0   | 24 | 0  | 12                  |
| ALA 382 | 18                              | 20  | 17  | 17  | 18                               | 20  | 17  | 17  | 0                                | 0   | 0  | 0  | 0                   |
| GLY 383 | 33                              | 35  | 37  | 35  | 33                               | 35  | 33  | 35  | 0                                | 0   | 4  | 0  | 4                   |
| GLN 384 | 133                             | 126 | 165 | 127 | 133                              | 126 | 156 | 127 | 0                                | 0   | 9  | 0  | 4                   |
| THR 385 | 69                              | 71  | 70  | 71  | 69                               | 71  | 70  | 71  | 0                                | 0   | 0  | 0  | 0                   |
| VAL 386 | 0                               | 0   | 0   | 0   | 0                                | 0   | 0   | 0   | 0                                | 0   | 0  | 0  | 0                   |
| THR 387 | 42                              | 39  | 42  | 40  | 42                               | 39  | 42  | 40  | 0                                | 0   | 0  | 0  | 0                   |
| ILE 388 | 0                               | 0   | 0   | 0   | 0                                | 0   | 0   | 0   | 0                                | 0   | 0  | 0  | 0                   |
| ILE 389 | 50                              | 48  | 49  | 48  | 10                               | 48  | 49  | 11  | 40                               | 0   | 0  | 37 | <u>39</u>           |
| ALA 390 | 0                               | 0   | 0   | 0   | 0                                | 0   | 0   | 0   | 0                                | 0   | 0  | 0  | 0                   |
| GLN 391 | 43                              | 44  | 43  | 46  | 2                                | 44  | 43  | 9   | 41                               | 0   | 0  | 37 | <u>35</u>           |
| TYR 392 | 58                              | 59  | 47  | 60  | 43                               | 59  | 47  | 60  | 15                               | 0   | 0  | 0  | 6                   |
| LYS 393 | 55                              | 55  | 54  | 54  | 32                               | 53  | 54  | 53  | 23                               | 2   | 0  | 1  | 11                  |
| PRO 394 | 49                              | 45  | 48  | 47  | 34                               | 45  | 48  | 47  | 15                               | 0   | 0  | 0  | 9                   |
| GLU 395 | 150                             | 146 | 148 | 149 | 38                               | 146 | 148 | 149 | 112                              | 0   | 0  | 0  | <u>50</u>           |
| GLU 396 | 56                              | 67  | 56  | 62  | 46                               | 67  | 56  | 62  | 10                               | 0   | 0  | 0  | 4                   |
| TYR 397 | 28                              | 26  | 27  | 25  | 28                               | 22  | 27  | 25  | 0                                | 4   | 0  | 0  | 2                   |
| SER 398 | 64                              | 62  | 64  | 58  | 63                               | 62  | 64  | 58  | 1                                | 0   | 0  | 0  | 1                   |



| Residue | Monomeric ASA (Å <sup>2</sup> ) |     |     |     | Tetrameric ASA (Å <sup>2</sup> ) |     |     |     | Tetrameric BSA (Å <sup>2</sup> ) |    |   |   | Total RSA (%) |
|---------|---------------------------------|-----|-----|-----|----------------------------------|-----|-----|-----|----------------------------------|----|---|---|---------------|
|         | A                               | B   | C   | D   | A                                | B   | C   | D   | A                                | B  | C | D |               |
| ARG 399 | 188                             | 187 | 187 | 183 | 115                              | 187 | 187 | 183 | 73                               | 0  | 0 | 0 | 27            |
| PHE 400 | 90                              | 92  | 89  | 89  | 90                               | 73  | 89  | 89  | 0                                | 19 | 0 | 0 | 8             |
| GLU 401 | 71                              | 75  | 73  | 73  | 71                               | 35  | 69  | 73  | 0                                | 40 | 4 | 0 | 20            |
| ALA 402 | 125                             | 120 | 124 | 113 | 95                               | 120 | 124 | 113 | 30                               | 0  | 0 | 0 | 23            |

Monomeric ASAs (Accessible Surface Area) and Tetrameric ASAs values of all residues of PDZ3-F340A of the crystallographic tetramer (Chain A, Chain B, Chain C, and Chain D) calculated by DSSP. BSA (Buried Surface Area) obtained by subtraction of tetrameric ASAs (Accessible Surface Area) from Monomeric ASAs. The total relative accessible surface area was calculated as  $RSA = ASA / \text{Maximum ASA}$ , where maximum ASA was from theoretical normalization values [23].

**Table S2:** Molecular weight of PDZ3 variants determined by MALDI-TOF MS

| Name             | Exp. Mw (Da) | Cal. Mw (Da) | Relative error (%)    |
|------------------|--------------|--------------|-----------------------|
| PDZ3-F340A/E310L | 10904.52     | 10911.29     | $6.20 \times 10^{-2}$ |
| PDZ3-F340A/N326L | 10918.97     | 10926.30     | $6.71 \times 10^{-2}$ |
| PDZ3-F340A/R309L | 10886.40     | 10884.22     | $2.00 \times 10^{-2}$ |
| PDZ3-F340A       | 10929.82     | 10927.25     | $2.35 \times 10^{-2}$ |
| PDZ3-wt          | 11004.68     | 11003.35     | $1.21 \times 10^{-2}$ |

Experimental molecular weight (Exp. Mw) determined by MALDI-TOF MS measurements and calculated molecular weight (Cal. Mw) by ProtParam (<http://web.expasy.org/protparam/>). Relative errors are in percentages ( $|Exp. Mw - Cal. Mw| / Cal. Mw \times 100$ .)

**Table S3:** Secondary structure contents of PDZ3 variants calculated by BeStSel.

|                  | Helix | Anti-parallel | Parallel | Turn | Others |
|------------------|-------|---------------|----------|------|--------|
| PDZ3-F340A/E310L | 14.0  | 30.1          | 3.6      | 12.0 | 40.4   |
| PDZ3-F340A/N326L | 14.0  | 29.9          | 3.2      | 11.8 | 41.1   |
| PDZ3-F340A/R309L | 12.2  | 28.8          | 3.2      | 12.5 | 43.3   |
| PDZ3-F340A       | 12.8  | 29.3          | 3.9      | 12.2 | 41.7   |
| PDZ3-wt          | 16.3  | 25.7          | 4.9      | 11.6 | 41.5   |

Secondary structure contents of PDZ3 variants calculated by BeStSel (<https://bestsel.elte.hu/index.php>) [39]. CD spectra of PDZ3 variants were measured at 0.2 mg/mL, pH 7.5 and 25°C.

**Table S4:** Sedimentation velocity analysis of PDZ3 variants at 25°C analyzed using SEDFIT and SEDNTERP

| Variants         | Weighted average sedimentation coefficient (S) | Calculated molecular weight ( $M_{\text{exp}}$ , Da) | Monomeric population (%) | Calculated molecular weight from amino acid sequence ( $M_{\text{calc}}$ , Da) | $M_{\text{exp}}/M_{\text{calc}}$ |
|------------------|------------------------------------------------|------------------------------------------------------|--------------------------|--------------------------------------------------------------------------------|----------------------------------|
| PDZ3-F340A/E310L | 1.47                                           | 9596.74                                              | 85.40                    | 10911.3                                                                        | 0.88                             |
| PDZ3-F340A/N326L | 1.53                                           | 10066.47                                             | 84.61                    | 10926.3                                                                        | 0.92                             |
| PDZ3-F340A/R309L | 1.48                                           | 9863.68                                              | 76.09                    | 10884.2                                                                        | 0.91                             |
| PDZ3-F340A       | 1.50                                           | 9775.70                                              | 89.01                    | 10927.3                                                                        | 0.89                             |
| PDZ3-wt          | 1.53                                           | 10132.56                                             | 85.62                    | 11003.4                                                                        | 0.92                             |

Sedimentation velocity analysis of 1 mg/mL, pH 7.5 of PDZ3 variants was performed at 25°C, and experimental data were analyzed using SEDFIT and SEDNTERP [42-43].

**Table S5:** Residues of PDZ3 variants between DSC raw data and fitting curves calculated with DDCL3

| Name             | Model                         | Residuals ( $\mu$ W) |
|------------------|-------------------------------|----------------------|
| PDZ3-F340A/E310L | <b>N-D</b>                    | <b>0.275</b>         |
|                  | N-1/3(I <sub>3</sub> )-D      | 0.187                |
|                  | N-1/4(I <sub>4</sub> )-D      | 0.181                |
|                  | N-1/5(I <sub>5</sub> )-D      | 0.182                |
| PDZ3-F340A/N326L | N-D                           | N.A.                 |
|                  | N-1/3(I <sub>3</sub> )-D      | 0.317                |
|                  | <b>N-1/4(I<sub>4</sub>)-D</b> | <b>0.259</b>         |
|                  | N-1/5(I <sub>5</sub> )-D      | 0.274                |
| PDZ3-F340A/R309L | <b>N-D</b>                    | <b>0.253</b>         |
|                  | N-1/3(I <sub>3</sub> )-D      | 0.177                |
|                  | N-1/4(I <sub>4</sub> )-D      | 0.231                |
|                  | N-1/5(I <sub>5</sub> )-D      | 0.231                |
| PDZ3-F340A       | <b>N-D</b>                    | <b>0.254</b>         |
|                  | N-1/3(I <sub>3</sub> )-D      | 0.215                |
|                  | N-1/4(I <sub>4</sub> )-D      | 0.215                |
|                  | N-1/5(I <sub>5</sub> )-D      | 0.215                |
| PDZ3-wt          | N-D                           | N.A.                 |
|                  | N-1/3(I <sub>3</sub> )-D      | 0.333                |
|                  | N-1/4(I <sub>4</sub> )-D      | 0.312                |
|                  | <b>N-1/5(I<sub>5</sub>)-D</b> | <b>0.307</b>         |

The oligomer number of the intermediate (I) state varied from trimer (I<sub>3</sub>) to pentamer (I<sub>5</sub>) at the thermal transition models. Optimal thermal transition models of each PDZ3 variant were determined by comparing the minimal residuals.

**Table S6:** Hydrodynamic radius (nm,  $R_h$ ) by DLS

| Name             | 25°C      | 40°C      | 60°C      | 70°C      | 80°C      | 90°C      | 25°C<br>(Reverse) |
|------------------|-----------|-----------|-----------|-----------|-----------|-----------|-------------------|
| PDZ3-F340A/E310L | 1.40±0.13 | 1.68±0.04 | 1.22±0.11 | 1.35±0.23 | 1.64±0.19 | 0.37±0.04 | 1.34±0.03         |
| PDZ3-F340A/N326L | 1.60±0.11 | 1.57±0.11 | 1.63±0.09 | 5.03±0.22 | 6.38±0.10 | 2.13±0.17 | 1.19±0.06         |
| PDZ3-F340A/R309L | 1.44±0.18 | 1.51±0.01 | 1.32±0.06 | 1.80±0.15 | 1.80±0.30 | 2.11±0.01 | 1.33±0.26         |
| PDZ3-F340A       | 1.63±0.06 | 1.63±0.02 | 1.62±0.01 | 1.87±0.02 | 2.34±0.03 | 2.21±0.05 | 1.63±0.01         |
| PDZ3-wt          | 1.46±0.02 | 1.57±0.06 | 1.62±0.03 | 2.54±0.25 | 2.31±0.18 | 2.37±0.10 | 1.45±0.03         |

DLS was measured at 0.5 mg/mL, pH 7.5, and 25-90°C, and after cooling the sample back to 25°C after heating.  $R_h$  values were calculated from size-number graphs. The errors are the standard deviation of three-times measurements with the same sample.
